1 PlrA (MSMEG\_5223) is an essential polar growth regulator in *Mycobacterium smegmatis*

2

3 By Samantha Y. Quintanilla<sup>1</sup>, Neda Habibi Arejan<sup>1</sup>, Parthvi B. Patel, and Cara C. Boutte<sup>1</sup>

4

5 <sup>1</sup> Department of Biology, University of Texas Arlington, Arlington, TX

6

## 7 **Abstract**

8

9 Mycobacteria expand their cell walls at the cell poles in a manner that is not well described at  
10 the molecular level. In this study, we identify a new factor, PlrA, involved in restricting  
11 peptidoglycan metabolism to the cell poles in *Mycobacterium smegmatis*. We show that PlrA  
12 localizes to the pole tips, and we identify its essential domain. We show that depletion of *plrA*  
13 pheno-copies depletion of polar growth factor Wag31, and that PlrA is involved in regulating  
14 polar peptidoglycan metabolism and the structure of the Wag31 polar foci.

15

## 16 **Introduction**

17

18 Expansion of the cell wall is critical for bacterial growth. In rod shaped bacteria, cells expand by  
19 elongating the rod, and then divide centrally to propagate daughter cells. Elongation occurs  
20 along the lateral walls in many proteobacterial and firmicute species [1]. Polar elongation occurs  
21 in several alphaproteobacterial species [2] and in Actinomycetes [3,4]. In the  
22 alphaproteobacterium *Agrobacterium tumefaciens*, polar growth is dependent on Growth Pole  
23 Ring (GPR) protein, which forms a ring around the pole and is required for restricting  
24 peptidoglycan synthesis to the pole [5,6]. Many Actinobacteria, including mycobacteria, also  
25 elongate at the poles [3,7]. Actinobacterial polar growth is dependent on DivIVA-like proteins [8–  
26 12], which, like the GPR, restrict peptidoglycan synthesis to the poles [12]. The molecular  
27 mechanisms by which GPR and DivIVA proteins mediate polar elongation have not been  
28 described.

29

30 In Mycobacteria, the polar DivIVA-like protein is called Wag31. Wag31 localizes to the cell  
31 poles, with more Wag31 associated with the faster-growing old pole [9,13,14]. While it is clear  
32 that Wag31 is essential for establishing the pole and restricting peptidoglycan metabolism to the  
33 pole [12,15], it is not at all clear how it works. Wag31 has no enzymatic domains and is  
34 cytoplasmic. In firmicutes, DivIVA proteins have been shown to recruit and activate other

35 proteins involved in cell wall synthesis and regulation [16–20]. It is presumed that Wag31  
36 somehow regulates polar peptidoglycan synthesis enzymes. However, despite being  
37 immunoprecipitated to find interaction partners in several studies [21–23], Wag31 has never  
38 been shown to interact with any other polar peptidoglycan synthesis enzymes.

39  
40 The complex of cytoplasmic, transmembrane and periplasmic regulators and cell wall enzymes  
41 that collectively mediate the ordered elongation of the cell wall is called the elongasome. In  
42 lateral growers, the elongasome comprises cytoplasmic regulators like MreB, and peptidoglycan  
43 enzymes including RodA and PBP2 [1,24]. These proteins all function together as a complex to  
44 allow the ordered insertion of new peptidoglycan. Wag31 has been called an elongasome  
45 protein in Mycobacteria [4]; however, it is not at all clear that Mycobacterial elongation is  
46 mediated by a large protein complex that functions similarly to the elongasome characterized in  
47 *E. coli* and other lateral growers. First, recent work shows that the critical peptidoglycan  
48 synthases required for polar growth are not even localized to the pole, but instead are  
49 distributed nearly evenly around the cell membrane [25]. There must therefore be a system to  
50 activate these proteins only near the pole. One model is that cell wall synthesis is activated by  
51 the availability of cell wall precursors such as lipidII. Cell wall precursor enzymes are localized  
52 largely to the Intracellular Membrane Domain, a biochemically distinct region of the inner  
53 membrane that is localized mostly peri-polarly [15,26,27]. IMD enzymes, such as MurG are  
54 therefore near the pole, but not at the pole, and they do not co-localize with Wag31. Thus, it  
55 remains an open question how Wag31 can regulate the activity of enzymes when it does not co-  
56 localize either with those enzymes or the production of their substrates.

57  
58 Because polar growth in mycobacteria is so poorly understood, we reasoned that there are  
59 likely many genes involved in this process that have not yet been characterized. In this study,  
60 we describe initial characterization of one of those factors. In a previous study, we  
61 immunoprecipitated the transmembrane division factor FtsQ from *M. smegmatis* and identified  
62 several uncharacterized interactors [28]. One of these was MSMEG\_5223 (Rv1111), which we  
63 found localized to the cell poles as well as the septum [28]. In this study we show that  
64 MSMEG\_5223, hereafter called PlrA, is essential for polar elongation in *Msmeg*, and that, like  
65 Wag31, it restricts peptidoglycan metabolism to the pole. We also show that only the N-terminus  
66 of PlrA is essential. Finally, we show that depletion of PlrA affects the structure of the Wag31  
67 focus at the pole, suggesting that PlrA may regulate Wag31 oligomerization.

68

## 69 **Results**

70

### 71 **PlrA is essential for polar peptidoglycan metabolism and elongation**

72

73 *plrA* (MSMEG\_5223, Rv1111) is predicted by TnSeq to be essential for survival in both  
74 *Mycobacterium tuberculosis* [29] and *Msmeg* [30]. To study its function genetically, we made a  
75 strain, Ptet:: *plrA*, in which it can be transcriptionally depleted by removing the inducer  
76 anhydrotetracycline (Atc). We grew the Ptet:: *plrA* strain to logarithmic phase, then washed out  
77 the Atc and measured survival using CFUs. Our results (Fig. 1A) show that PlrA is essential for  
78 survival. We then examined the *plrA* -depleted cells microscopically and found that after 30  
79 hours of depletion, they are short with bulgy poles (Fig. 1B). These data show that *Msmeg* is  
80 unable to elongate properly and is unable to control cell wall structure at the poles without PlrA.  
81 We therefore conclude that PlrA is an essential polar elongation factor. Because PlrA does not  
82 have a predicted enzymatic domain, we infer that it is a regulator of polar elongation. We  
83 therefore name it *plrA* for pole regulator A.

84

85 *Mycobacteria* insert new peptidoglycan and other cell wall materials near the cell poles to  
86 elongate [7,13]. We used the fluorescent D-alanine HADA [31] to probe how the distribution of  
87 peptidoglycan metabolism in the cells was affected by *plrA* depletion. We found that *plrA*  
88 depletion led to delocalized HADA staining, instead of the typical poles and septa pattern (Fig.  
89 1BC). HADA reports on both insertion of new peptidoglycan and remodeling of existing  
90 peptidoglycan [27,32], so these data cannot tell us whether new peptidoglycan synthesis is  
91 occurring all along the lateral walls, or whether peptidoglycan remodeling is just de-regulated.  
92 However, because most of the HADA signal comes from peptidoglycan remodeling [32], and  
93 because cell elongation is clearly slowed, we conclude that *plrA* likely promotes polar-adjacent  
94 peptidoglycan remodeling, as well as polar insertion of new peptidoglycan. Short, bulgy cells  
95 and delocalized peptidoglycan metabolism is also seen when the essential DivIVA homolog  
96 Wag31 is depleted [9,12].

97

### 98 **PlrA localizes to the tips of both cell poles.**

99

100 In our previous study, we showed that PlrA localizes to cell poles and septa in *Msmeg* [28]. The  
101 polar growth regulator Wag31 has a similar localization pattern, and is seen to localize more  
102 strongly to the faster-growing old pole [23]. We stained cells expressing PlrA-GFPmut3 with

103 HADA, which stains the old pole more brightly [32], in order to see if PlrA localizes in a similar  
104 pattern. We found (Fig. 2) that PlrA-GFPmut3 does have slightly brighter signal at the pole with  
105 brighter HADA staining, indicating that it localizes more to the faster growing pole. However, on  
106 average PlrA localization is similar between the two poles, compared to the significant  
107 difference in HADA staining between the new and old poles (Fig. 2BC). These data show that  
108 PlrA has a similar localization pattern as Wag31, in that it localizes to the pole tips [9]; however,  
109 the minimal asymmetry in PlrA localization suggests that the amount of PlrA at the pole is likely  
110 not responsible for regulating the asymmetry of polar elongation [13,33].

111

### 112 **The C-terminus of PlrA is dispensable, while the N-terminus is essential.**

113

114 PlrA has an N-terminal membrane domain with four predicted transmembrane passes and and  
115 C-terminal predicted cytoplasmic domain [34]. Because PlrA has no significant sequence  
116 similarity to any gene characterized in bacteria, we sought to dissect its essentiality, by  
117 determining whether both or only one of these domains was essential. First, we used ConSurf  
118 [35] to identify the relative conservation of each amino acid in the *Msmeg* protein. This analysis  
119 shows that the N-terminal membrane domain is more highly conserved than the C-terminal  
120 cytoplasmic domain (Fig. 3A).

121

122 Then, we used L5 allele swapping [36] to replace the full-length *plrA* with *plrA* $\Delta$ CT (residues 1-  
123 117) or with *plrA* $\Delta$ NT (residues 118-368). In this method, a copy of *plrA* under the control of a  
124 tet-inducible promoter was cloned into a *nuoR* vector carrying the TetR repressor and inserted  
125 into the *Msmeg* genome at the L5 phage integrase site, then the endogenous copy of *plrA* was  
126 deleted. We then cloned the full-length and truncation alleles of *plrA*, also under tet-promoters,  
127 into a kanR L5 integrating vector without the *tetR* gene. Transformation of these kanR vectors  
128 into the *Msmeg* strain carrying *plrA* only at the L5 site could result in either *nuoR* +kanR double  
129 integrants, or in kanR *nuoS* allele swaps. Because only the original L5 vector carries *tetR*, which  
130 will repress expression of either of the *plrA* alleles in either L5 vector, we plate the transformants  
131 without the Atc inducer and therefore select against the double integrants. Because *plrA* is  
132 essential (Fig. 1A), in this setup, we will only get colonies on the transformation plate if the *plrA*  
133 allele in the second, kanR vector is functional enough to support growth. We found that a strain  
134 carrying only *plrA* $\Delta$ CT is viable, while a strain carrying only *plrA* $\Delta$ NT is not viable. This indicates  
135 that the more highly conserved N-terminal domain is essential, while the C-terminal domain is  
136 not (Fig. 3B). All *plrA* alleles were cloned with a C-terminal strep tag, and we tested the stability

137 of the PlrA truncations by western blot (Fig. 3C). We made merodiploid strains of all the  
138 constructs so we could test whether the PlrA $\Delta$ NT protein is stable. We found that PlrA $\Delta$ NT is  
139 even more stable than the full length protein, while the PlrA $\Delta$ CT protein is less stable, and did  
140 not yield a detectable band on the western blot in either the merodiploid or the allele swap  
141 strain. This shows that the C-terminal domain of PlrA is not essential for function, and is not  
142 required merely for protein stabilization. These data also suggest that very little PlrA is needed  
143 for survival, as the PlrA $\Delta$ CT protein is undetectable by western, despite supporting growth.

144

145 We next tested whether the PlrA C-terminal domain contributes to growth in logarithmic phase.  
146 We found that the *plrA* $\Delta$ CT strain has no defects in growth rate (Fig. 3D), cell morphology (Fig.  
147 3E) or peptidoglycan metabolism as measured by fluorescent D-amino acid staining (Fig. 3F).  
148 These data show that the C-terminal domain of PlrA is entirely dispensable for normal  
149 logarithmic phase growth.

150

### 151 **Depletion of PlrA causes atypical accumulation of Wag31 at the poles**

152

153 Because the *plrA* depletion (Fig. 1) exhibited a similar phenotype as the *wag31* depletion [12],  
154 we hypothesized that these two proteins may work together to regulate polar growth. We first  
155 sought to determine whether Wag31 localization is dependent on PlrA. We transformed a vector  
156 expressing a Wag31-mRFP fusion into the Ptet::*plrA* depletion strain. We grew the resulting  
157 strain with or without the Atc inducer, then HADA-stained the cells and examined them  
158 microscopically. We found that Wag31-mRFP still localizes to the cell poles in the cells depleted  
159 for *plrA* (Fig. 4A). However, we observed that the size and intensity of the Wag31 foci was more  
160 variable in the *plrA*-depleted cells (Fig. 4BCD). Many of the *plrA*-depleted cells, especially the  
161 shorter cells which are presumably more severely depleted, have unusually bright and large  
162 foci, while other cells have very dim Wag31-mRFP foci (Fig. 4B). In the control cells (left side of  
163 Fig. 4), HADA and Wag31-RFP intensity are greater at the same cell pole in each cell, which we  
164 expect to be the old pole [32]. In the *plrA*-depleted cells, the new pole can be identified in V-  
165 snapping cells as the pole at the vertex of the V. We find, in these V-snaps, that the old pole is  
166 often dimmer by HADA than the new pole, while the new pole is usually the one bulging. We  
167 find that the unusually bright Wag31 foci are often at HADA-dim old poles (Fig. 4AB), and  
168 therefore the cell pole that is brighter by HADA is not also brighter by Wag31-RFP (Fig. 4C).

169

170 To probe the relationship between peptidoglycan metabolism - as measured by HADA staining -  
171 and Wag31-RFP localization, we plotted the maximum values of fluorescence intensity at each  
172 cell pole against each other (Fig. 4D). We find that in the control cells, the presumed old poles  
173 (brighter by HADA) have roughly gaussian distributions of both Wag31 and HADA signal across  
174 the population, and there is not a significant correlation between the signal in these two  
175 channels. This suggests that in the control cells, all the old poles are similar with respect to  
176 peptidoglycan metabolism and Wag31, which is what we expect since all old poles grow at the  
177 same rate [13,37]. There is a weak correlation between Wag31-RFP signal and HADA signal in  
178 control cells at the presumed new poles (Fig. 4D). However, this makes sense as the new pole  
179 undergoes changes throughout the cell cycle: right after division it does not elongate, and so we  
180 see less peptidoglycan metabolism (Fig. 4BD), but as the cells mature, the new pole becomes  
181 elongation-competent [37], and we see a corresponding increase in Wag31-RFP signal (Fig.  
182 4BD). In the *plrA*-depleted cells, we see a loss of Wag31-RFP signal intensity clustering in both  
183 poles, and the correlation between HADA signal and Wag31-RFP signal at the HADA-dim pole  
184 is lost. These data suggest that PlrA helps control the structure of the Wag31 focus, as well as  
185 the polarity of peptidoglycan metabolism.

186

## 187 Discussion

188

189 It remains an open question how much the “elongasome” model from lateral growing bacteria  
190 should serve as inspiration for developing models for polar growth. In this model, cytoplasmic  
191 regulators help control periplasmic cell wall enzymes through trans-membrane protein  
192 interactions. In both the alphaproteobacterium *A. tumefaciens* and the actinobacterium *C.*  
193 *glutamicum*, this model seems to hold up to some extent, as the key polar peptidoglycan  
194 transglycosylase enzymes are localized at the cell poles [38,39], and in *C. glutamicum* is  
195 anchored there through a cytoplasmic regulator [39]. We do wish to note that mis-localization of  
196 proteins can occur easily during over-expression, for example [40,41]. The model of the  
197 elongasome complex does not seem to apply in *Mycobacterium smegmatis*, where the putative  
198 polar growth regulator Wag31 does not co-localize with either peptidoglycan precursor enzymes  
199 or transglycosylases [23,25–27,42]. Since polar growth appears to work so differently in  
200 Mycobacteria, we reasoned that there must be other essential factors involved in this process,  
201 and that characterizing those factors may help establish a new model for Mycobacterial polar  
202 growth.

203



204 Our work shows that the membrane domain of PlrA is the domain essential for polar growth,  
205 and the cytoplasmic domain appears to not have any function during logarithmic phase growth  
206 (Fig. 3). Non-enzymatic membrane proteins involved in cell growth and division can either have  
207 roles regulating enzymes in the periplasm [43] or the cytoplasm [44], or they can bind and  
208 regulate other factors through their membrane-pass regions [45,46]. The fully functional  
209 PlrA $\Delta$ CT protein has only a four-amino acid cytoplasmic loop, while there is a 22-amino acid  
210 periplasmic loop. The most highly conserved residues are in the membrane passes and in a  
211 region of the periplasmic loop. We therefore think it most likely that PlrA regulates either a  
212 periplasmic enzyme, or another membrane protein through membrane contacts.

213  
214 What could PlrA be doing to Wag31? Previous work has only shown that increased Wag31 at  
215 sites in the cell causes increases in polar growth [47]. Our work shows that a large Wag31 focus  
216 can be inactive in polar growth when PlrA is missing. The asymmetry of Wag31 foci at the  
217 poles, which correlates with the asymmetry of growth, suggests that the conformation or size of  
218 the homo-oligomeric Wag31 network could be involved in regulating polar growth (Fig 4BD).  
219 Our work suggests that PlrA is required for a Wag31 focus to permit polar peptidoglycan  
220 synthesis (Fig. 4). Perhaps PlrA helps control the chemical structure or shape of the pole, which  
221 may, in turn, affect Wag31 oligomer organization. Depletion data suggests that pole structure is  
222 dependent on PlrA, not solely on the presence of the Wag31 oligomer, as the Wag31 oligomer  
223 remains in place when the poles bulge due to *plrA* depletion (Fig. 4A).

224

## 225 **Materials and Methods**

226

227 **Bacterial strains and culture conditions.** *M. smegmatis* mc<sup>2</sup>155 was cultured in 7H9 (Becton,  
228 Dickinson and Co, Sparks, MD) medium with additives as described [28] or plated on LB  
229 Lennox agar. *E. coli* DH5a, TOP10, or XL1-Blue cells were used for cloning. The antibiotic  
230 concentrations used for *M. smegmatis* were: 25 mg/ml kanamycin, 50 mg/ml hygromycin, 20  
231 mg/ml nourseothricin, and 20 mg/ml zeocin. The antibiotic concentrations used for *E. coli* strain  
232 were: 50 mg/ml kanamycin, 100 mg/ml hygromycin, 50 mg/ml zeocin,  
233 and 40 mg/ml nourseothricin. Anhydrotetracycline was used at between 50 and 250 ng/ml for  
234 gene induction or repression.

235

236 **Strain construction.** Knockout of *plrA* was made by first integrating a copy of the gene at the  
237 L5 site [48] in the pMC1s vector with a tet-inducible P750 promoter. The endogenous copies of

238 the gene was then knocked out using double stranded recombineering, as described [49].  
239 Vectors were assembled using Gibson cloning [50], some with the SSB enhancement [51].

240

241 **Colony forming unit assay.** Clones of the Ptet:: *plrA* strain were grown to logarithmic phase in  
242 7H9 with nourseothricin, zeocin, and 500 ng/mL of anhydrotetracycline (Atc). All cultures were  
243 washed to remove Atc, and diluted to OD=0.1, Atc was added to half the cultures and allowed to  
244 grow. At the 7 hour time point, both cultures were diluted to OD=0.01. At the 24 hour time point,  
245 both cultures were diluted to OD=0.2. At the 28 hour time point, both cultures were diluted to  
246 OD=0.1. At the 35 hour time point only the +Atc culture was diluted to OD=0.01. Atc was re-  
247 added to the +Atc cultures only during the dilutions. CFU were measured on LB plates with  
248 nourseothricin, zeocin and Atc.

249

### 250 **Microscopy and image analysis.**

251 Microscopy was performed on living cells immobilized on Hdb-agarose pads. A Nikon Ti-2  
252 widefield epifluorescence microscope with a Photometrics Prime 95B camera and a Plan Apo  
253 100x, 1.45 NA objective was used for imaging. The GFPmut3 images were taken with a  
254 470/40nm excitation filter, a 525/50nm emission filter and a 495nm dichroic mirror. The HADA  
255 images were taken using a 350/50nm excitation filter, a 460/50nm emission filter and a 400nm  
256 dichroic mirror. The mRFP images were taken with a 560/40nm excitation filter, a 630/70nm  
257 emission filter and a 585nm dichroic mirror. All images were processed using NIS  
258 Elements software and analyzed using FIJI and MicrobeJ [52].

259

### 260 **Figure Legends**

261



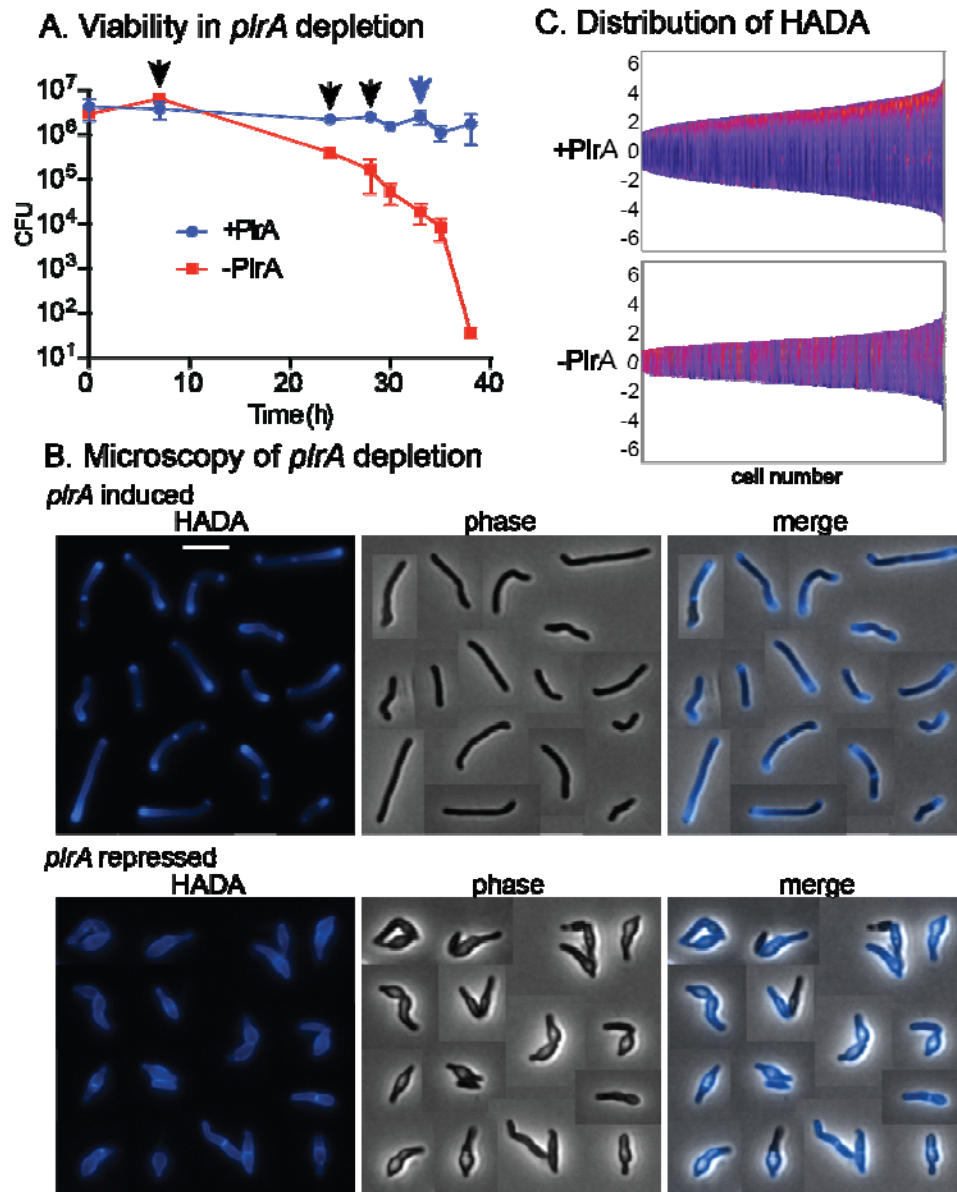

262

263

264 **Figure 1. PlrA is an essential polar growth regulator.** A) CFU of the P<sub>tet</sub>::*plrA* strain in the  
265 presence (*plrA* induced) or absence (*plrA* repressed) of inducer Atc. Three independent  
266 replicate cultures were used for each condition. Black arrows represent where dilutions were  
267 performed in both cultures to prevent them reaching stationary phase. Blue arrow indicates  
268 where dilution was performed in the +Atc (+PlrA) culture only. B) Micrographs of a P<sub>tet</sub>::*plrA*  
269 strain with *plrA* induced (top, +Atc) or repressed (bottom, -Atc), then stained with the fluorescent  
270 D-alanine HADA for 15 minutes. Cells from different images were cut and pasted together so  
271 that a representative collection of cells could be shown. The scale bar on the top left image is 5  
272 microns, and applies to all images. C) Demographs of HADA intensity along the length of cells

273 (Y axis) in *plrA* induced (top) and depleted (bottom) cells from panel B. Cells were sorted by  
274 size (X axis) and pole sorted, so that brightest pole is set at the top. Lighter colors represent  
275 higher HADA intensity.

276

#### A. Micrographs of PlrA-GFPmut3

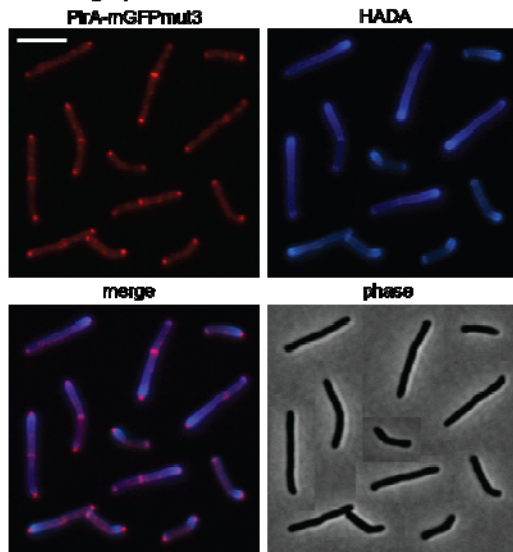

#### B. Distribution of PlrA-GFPmut3

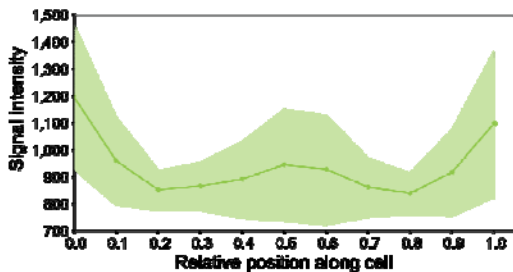

#### C. Distribution of HADA staining

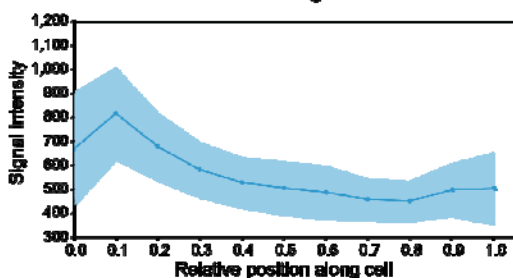

277

278 **Figure 2. PlrA localizes to the pole tips.** A) Micrographs of *Msmeg mc<sup>2</sup>155* expressing PlrA-  
279 GFPmut3 as a merodiploid and stained with the fluorescent D-alanine HADA. The GFP signal  
280 was false colored to red to make the channels easier to distinguish. The scale bar on the top left  
281 image is 5 microns, and it applies to all images. Cells from different images were cut and pasted  
282 together so that a representative collection of cells could be shown. BC) Mean intensity of PlrA-  
283 GFPmut3 (B) and HADA (C) signal along the length of ~300 cells, at least 100 from each of

284 three biological replicates. Center line is the mean signal, lighter area is the standard deviation.  
 285 Cells were pole sorted, so the brightest pole in the HADA channel is set to 0, and the dimmer  
 286 pole is set to 1 on the X axis.  
 287

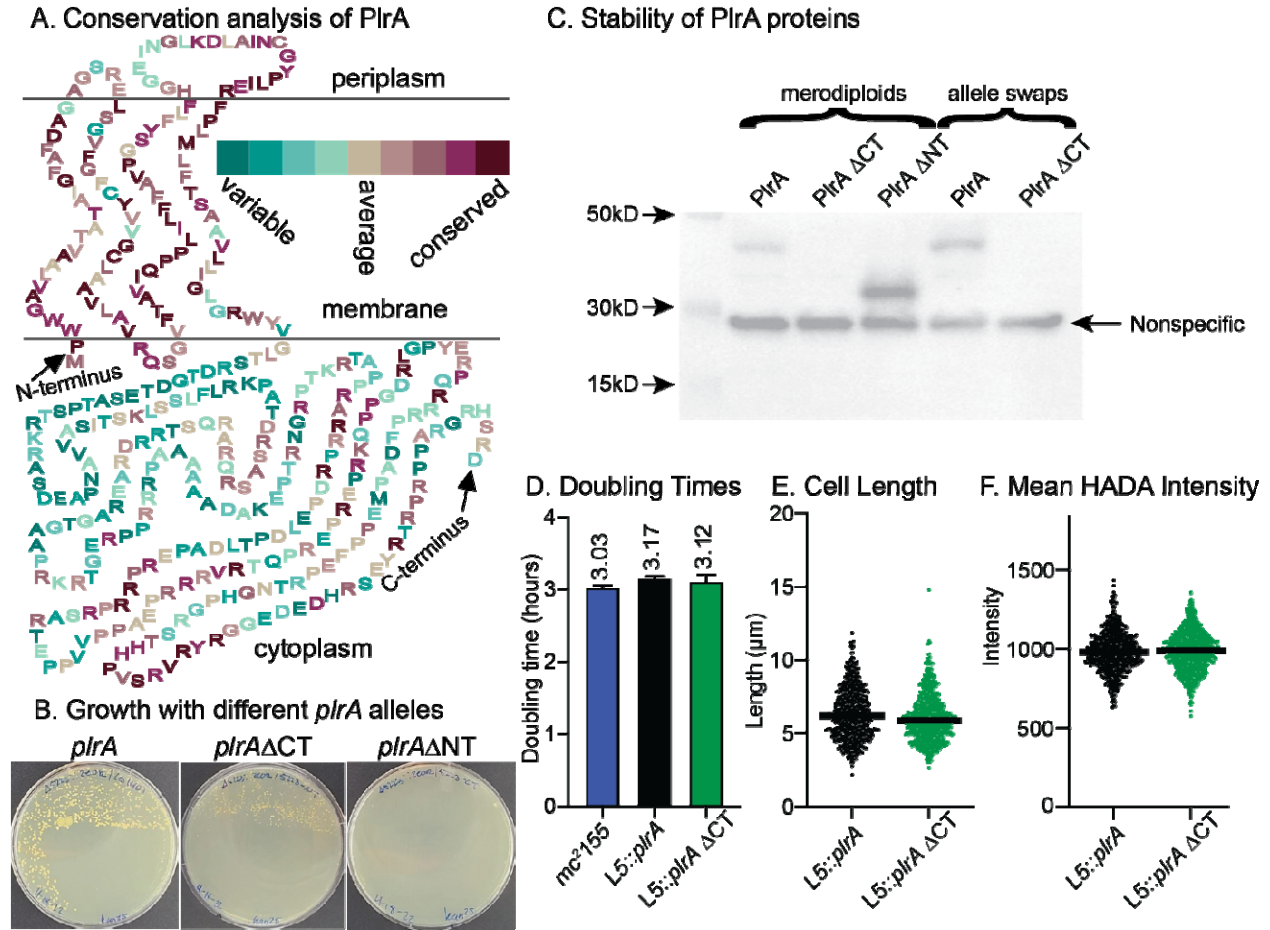

288  
 289 **Figure 3. The C-terminal domain of PlrA is dispensable.** A) PlrA protein sequence arranged  
 290 in either periplasmic, membrane or cytoplasm as predicted by TMHMM. Amino acids are  
 291 colored according to conservation as measured by Consurf analysis. B) Plates resulting from L5  
 292 allele swapping of the wild-type *plrA* with full-length *plrA*-strep, or *plrA* $\Delta$ CT-strep or *plrA* $\Delta$ NT-  
 293 strep. The experiment was arranged so that the original, wild-type allele is lost in any colonies.  
 294 C) Western blot of *Msmeg* strains carrying either *plrA*-strep, *plrA* $\Delta$ CT-strep and *plrA* $\Delta$ NT-strep  
 295 as merodiploids or allele swaps. PlrA-strep is 43kD, PlrA $\Delta$ CT-strep is 13kD, PlrA $\Delta$ NT strep is  
 296 31kD. D) Doubling times calculated from growth curves in 7H9 of the mc<sup>2</sup>155 parent,  $\Delta$ *plrA*  
 297 L5::*plrA*-strep, and  $\Delta$ *plrA* L5::*plrA* $\Delta$ CT-strep strains. E) Cell lengths of the  $\Delta$ *plrA* L5::*plrA*-strep,  
 298 and  $\Delta$ *plrA* L5::*plrA* $\Delta$ CT-strep strains in logarithmic phase, as quantified from phase microscopy  
 299 images by MicrobeJ analysis. F) Average HADA intensity per cell of cells from E.

300  
301

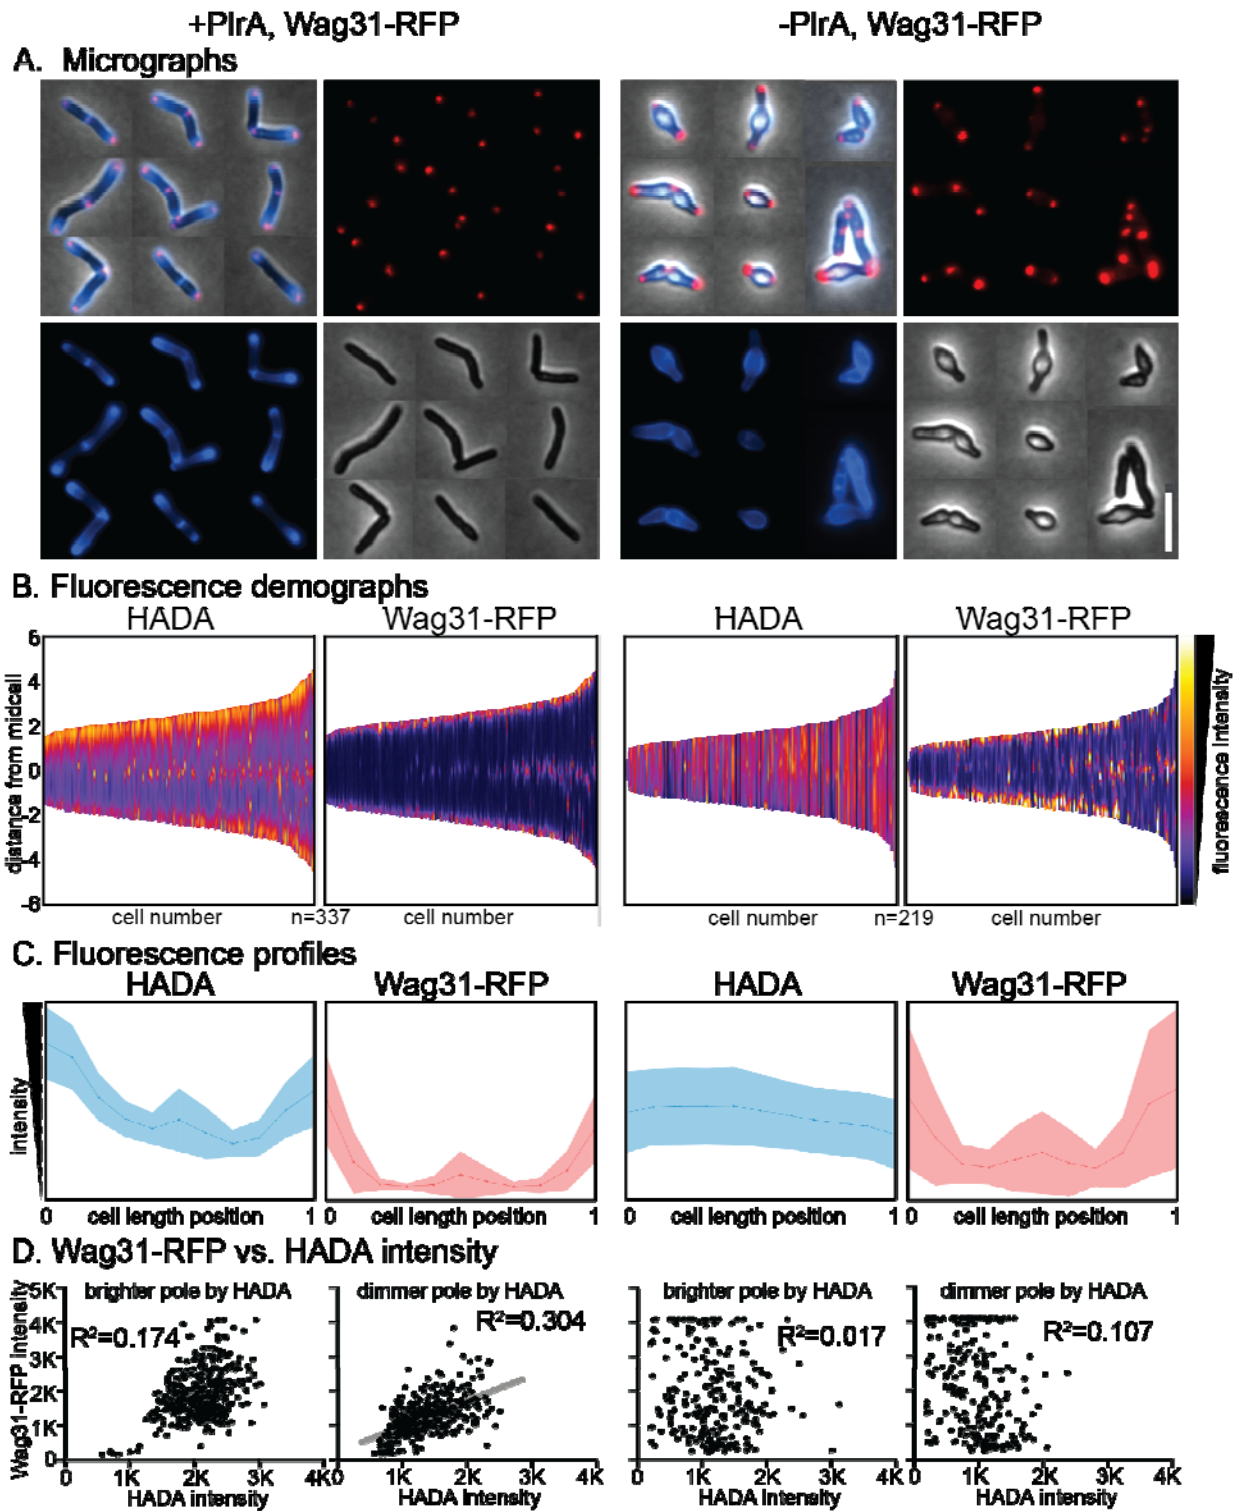

302  
303

304 **Figure 4. PlrA helps regulate the Wag31 polar foci.** A) Micrographs of Ptet::*plrA* Wag31-  
305 mRFP strains induced (left) and depleted (right) for *plrA*, and stained with HADA. Blue= HADA  
306 fluorescence image. Red= Wag31-RFP fluorescence image. Scale bar on bottom right is 5  
307 microns and applies to all images. B) Demographs of fluorescence intensity of the cell  
308 populations imaged in (A). *plrA* induced cells are on the left, *plrA* depleted cells on the right.  
309 Cells are arranged shortest to longest along the X axis, and arranged so the pole with the  
310 brighter HADA signal is positioned at the top. C) Mean fluorescence intensities (Yaxis) of all the  
311 cells from (A,B) at 11 points along the length of each cell. *plrA* induced cells are on the left, *plrA*  
312 depleted cells on the right. Darker line in the center is the mean, and shaded area is the  
313 standard deviation. Cells are sorted so that the pole with the brighter HADA intensity is set to 0  
314 on the X axis. Both HADA graphs have intensity values between 0-2400 on the Y axis. Both  
315 RFP graphs have intensity values between 0-3200 on the Y axis. D) Maximum Wag31-RFP  
316 signal (Yaxis) plotted against the maximum HADA signal (X axis) at each cell pole. *plrA* induced  
317 cells are on the left, *plrA* depleted cells on the right.  $R^2$  values were calculated by linear  
318 regression analysis. The gray line is the linear fit on the only graph with a correlation.

319

320

#### 321 **References:**

322

- 323 1. Egan AJF, Errington J, Vollmer W. Regulation of peptidoglycan synthesis and remodelling.  
324 Nat Rev Microbiol. 2020 [cited 18 May 2020]. doi:10.1038/s41579-020-0366-3
- 325 2. Brown PJB, de Pedro MA, Kysela DT, Van der Henst C, Kim J, De Bolle X, et al. Polar  
326 growth in the Alphaproteobacterial order Rhizobiales. Proceedings of the National  
327 Academy of Sciences. 2012;109: 1697–1701. doi:10.1073/pnas.1114476109
- 328 3. Flårdh K, Richards DM, Hempel AM, Howard M, Buttner MJ. Regulation of apical growth  
329 and hyphal branching in *Streptomyces*. Current Opinion in Microbiology. 2012;15: 737–  
330 743. doi:10.1016/j.mib.2012.10.012
- 331 4. Baranowski C, Rego EH, Rubin EJ. The Dream of a Mycobacterium. Microbiology  
332 Spectrum. 2019;7. doi:10.1128/microbiolspec.GPP3-0008-2018



- 333 5. Zupan JR, Grangeon R, Robalino-Espinosa JS, Garnica N, Zambryski P. GROWTH POLE  
334 RING protein forms a 200-nm-diameter ring structure essential for polar growth and rod  
335 shape in *Agrobacterium tumefaciens*. PNAS. 2019; 201905900.  
336 doi:10.1073/pnas.1905900116
- 337 6. Zupan J, Guo Z, Biddle T, Zambryski P. *Agrobacterium tumefaciens* Growth Pole Ring  
338 Protein: C Terminus and Internal Apolipoprotein Homologous Domains Are Essential for  
339 Function and Subcellular Localization. Sloan Siegrist M, editor. mBio. 2021;12: e00764-  
340 21, /mbio/12/3/mBio.00764-21.atom. doi:10.1128/mBio.00764-21
- 341 7. Thanky NR, Young DB, Robertson BD. Unusual features of the cell cycle in mycobacteria:  
342 Polar-restricted growth and the snapping-model of cell division. Tuberculosis. 2007;87:  
343 231–236. doi:10.1016/j.tube.2006.10.004
- 344 8. Kang C-M. The Mycobacterium tuberculosis serine/threonine kinases PknA and PknB:  
345 substrate identification and regulation of cell shape. Genes & Development. 2005;19:  
346 1692–1704. doi:10.1101/gad.1311105
- 347 9. Kang C-M, Nyayapathy S, Lee J-Y, Suh J-W, Husson RN. Wag31, a homologue of the cell  
348 division protein DivIVA, regulates growth, morphology and polar cell wall synthesis in  
349 mycobacteria. Microbiology. 2008;154: 725–735. doi:10.1099/mic.0.2007/014076-0
- 350 10. Letek M, Ordonez E, Vaquera J, Margolin W, Flardh K, Mateos LM, et al. DivIVA Is  
351 Required for Polar Growth in the MreB-Lacking Rod-Shaped Actinomycete  
352 *Corynebacterium glutamicum*. Journal of Bacteriology. 2008;190: 3283–3292.  
353 doi:10.1128/JB.01934-07
- 354 11. Hempel AM, Wang S -b., Letek M, Gil JA, Flardh K. Assemblies of DivIVA Mark Sites  
355 for Hyphal Branching and Can Establish New Zones of Cell Wall Growth in *Streptomyces*  
356 *coelicolor*. Journal of Bacteriology. 2008;190: 7579–7583. doi:10.1128/JB.00839-08
- 357 12. Melzer ES, Sein CE, Chambers JJ, Sloan Siegrist M. DivIVA concentrates mycobacterial  
358 cell envelope assembly for initiation and stabilization of polar growth. Cytoskeleton.  
359 2018;75: 498–507. doi:10.1002/cm.21490



- 360 13. Aldridge BB, Fernandez-Suarez M, Heller D, Ambravaneswaran V, Irimia D, Toner M, et  
361 al. Asymmetry and Aging of Mycobacterial Cells Lead to Variable Growth and Antibiotic  
362 Susceptibility. *Science*. 2012;335: 100–104. doi:10.1126/science.1216166
- 363 14. Santi I, Dhar N, Bousbaine D, Wakamoto Y, McKinney JD. Single-cell dynamics of the  
364 chromosome replication and cell division cycles in mycobacteria. *Nat Commun*. 2013;4:  
365 2470. doi:10.1038/ncomms3470
- 366 15. García-Heredia A, Kado T, Sein CE, Puffal J, Osman SH, Judd J, et al. Membrane-  
367 partitioned cell wall synthesis in mycobacteria. Xiao J, Storz G, editors. *eLife*. 2021;10:  
368 e60263. doi:10.7554/eLife.60263
- 369 16. Marston AL, Thomaidis HB, Edwards DH, Sharpe ME, Errington J. Polar localization of  
370 the MinD protein of *Bacillus subtilis* and its role in selection of the mid-cell division site.  
371 *Genes & Development*. 1998;12: 3419–3430. doi:10.1101/gad.12.21.3419
- 372 17. Marston AL, Errington J. Selection of the midcell division site in *Bacillus subtilis* through  
373 MinD-dependent polar localization and activation of MinC. *Molecular Microbiology*.  
374 1999;33: 84–96. doi:10.1046/j.1365-2958.1999.01450.x
- 375 18. Claessen D, Emmins R, Hamoen LW, Daniel RA, Errington J, Edwards DH. Control of the  
376 cell elongation–division cycle by shuttling of PBP1 protein in *Bacillus subtilis*. *Mol*  
377 *Microbiol*. 2008;68: 1029–1046. doi:10.1111/j.1365-2958.2008.06210.x
- 378 19. Eswara PJ, Brzozowski RS, Viola MG, Graham G, Spanoudis C, Trebino C, et al. An  
379 essential *Staphylococcus aureus* cell division protein directly regulates FtsZ dynamics.  
380 *eLife*. 2018;7. doi:10.7554/eLife.38856
- 381 20. Cleverley RM, Rutter ZJ, Rismondo J, Corona F, Tsui H-CT, Alatawi FA, et al. The cell  
382 cycle regulator GpsB functions as cytosolic adaptor for multiple cell wall enzymes. *Nature*  
383 *Communications*. 2019;10. doi:10.1038/s41467-018-08056-2
- 384 21. Mukherjee P, Sureka K, Datta P, Hossain T, Barik S, Das KP, et al. Novel role of Wag31 in  
385 protection of mycobacteria under oxidative stress. *Molecular Microbiology*. 2009;73: 103–  
386 119. doi:10.1111/j.1365-2958.2009.06750.x

- 387 22. Xu W, Zhang L, Mai J, Peng R, Yang E, Peng C, et al. The Wag31 protein interacts with  
388 AccA3 and coordinates cell wall lipid permeability and lipophilic drug resistance in  
389 *Mycobacterium smegmatis*. *Biochemical and Biophysical Research Communications*.  
390 2014;448: 255–260. doi:10.1016/j.bbrc.2014.04.116
- 391 23. Meniche X, Otten R, Siegrist MS, Baer CE, Murphy KC, Bertozzi CR, et al. Subpolar  
392 addition of new cell wall is directed by DivIVA in mycobacteria. *Proceedings of the*  
393 *National Academy of Sciences*. 2014;111: E3243–E3251. doi:10.1073/pnas.1402158111
- 394 24. Zhao H, Patel V, Helmann JD, Dörr T. Don't let sleeping dogmas lie: new views of  
395 peptidoglycan synthesis and its regulation: New views on peptidoglycan synthesis.  
396 *Molecular Microbiology*. 2017;106: 847–860. doi:10.1111/mmi.13853
- 397 25. Melzer ES, Kado T, García-Heredia A, Gupta KR, Meniche X, Morita YS, et al. Cell Wall  
398 Damage Reveals Spatial Flexibility in Peptidoglycan Synthesis and a Nonredundant Role  
399 for RodA in Mycobacteria. Federle MJ, editor. *J Bacteriol*. 2022; e00540-21.  
400 doi:10.1128/jb.00540-21
- 401 26. Hayashi JM, Luo C-Y, Mayfield JA, Hsu T, Fukuda T, Walfield AL, et al. Spatially distinct  
402 and metabolically active membrane domain in mycobacteria. *Proc Natl Acad Sci USA*.  
403 2016;113: 5400–5405. doi:10.1073/pnas.1525165113
- 404 27. García-Heredia A, Pohane AA, Melzer ES, Carr CR, Fiolek TJ, Rundell SR, et al.  
405 Peptidoglycan precursor synthesis along the sidewall of pole-growing mycobacteria. *eLife*.  
406 2018;7. doi:10.7554/eLife.37243
- 407 28. Wu KJ, Zhang J, Baranowski C, Leung V, Rego EH, Morita YS, et al. Characterization of  
408 Conserved and Novel Septal Factors in *Mycobacterium smegmatis*. Brun YV, editor.  
409 *Journal of Bacteriology*. 2018;200: e00649-17, /jb/200/6/e00649-17.atom.  
410 doi:10.1128/JB.00649-17
- 411 29. DeJesus MA, Gerrick ER, Xu W, Park SW, Long JE, Boutte CC, et al. Comprehensive  
412 Essentiality Analysis of the *Mycobacterium tuberculosis* Genome via Saturating  
413 Transposon Mutagenesis. Stallings CL, editor. *mBio*. 2017;8. doi:10.1128/mBio.02133-16

- 414 30. Dragset MS, Ioerger TR, Zhang YJ, Mærk M, Ginbot Z, Sacchettini JC, et al. Genome-wide  
415 Phenotypic Profiling Identifies and Categorizes Genes Required for Mycobacterial Low  
416 Iron Fitness. *Sci Rep*. 2019;9: 11394. doi:10.1038/s41598-019-47905-y
- 417 31. Kuru E, Hughes HV, Brown PJ, Hall E, Tekkam S, Cava F, et al. In Situ Probing of Newly  
418 Synthesized Peptidoglycan in Live Bacteria with Fluorescent D -Amino Acids.  
419 *Angewandte Chemie International Edition*. 2012;51: 12519–12523.  
420 doi:10.1002/anie.201206749
- 421 32. Baranowski C, Welsh MA, Sham L-T, Eskandarian HA, Lim HC, Kieser KJ, et al.  
422 Maturing *Mycobacterium smegmatis* peptidoglycan requires non-canonical crosslinks to  
423 maintain shape. *eLife*. 2018;7: e37516. doi:<https://doi.org/10.7554/eLife.37516> 1
- 424 33. Rego EH, Audette RE, Rubin EJ. Deletion of a mycobacterial divisome factor collapses  
425 single-cell phenotypic heterogeneity. *Nature*. 2017;546: 153–157. doi:10.1038/nature22361
- 426 34. Hallgren J, Tsigirgos KD, Pedersen MD, Almagro Armenteros JJ, Marcatili P, Nielsen H, et  
427 al. DeepTMHMM predicts alpha and beta transmembrane proteins using deep neural  
428 networks. *Bioinformatics*; 2022 Apr. doi:10.1101/2022.04.08.487609
- 429 35. Ashkenazy H, Abadi S, Martz E, Chay O, Mayrose I, Pupko T, et al. ConSurf 2016: an  
430 improved methodology to estimate and visualize evolutionary conservation in  
431 macromolecules. *Nucleic Acids Res*. 2016;44: W344–W350. doi:10.1093/nar/gkw408
- 432 36. Pashley CA, Parish T. Efficient switching of mycobacteriophage L5-based integrating  
433 plasmids in *Mycobacterium tuberculosis*. *FEMS Microbiology Letters*. 2003;229: 211–215.  
434 doi:10.1016/S0378-1097(03)00823-1
- 435 37. Hannebelle MTM, Ven JXY, Toniolo C, Eskandarian HA, Vuaridel-Thurre G, McKinney  
436 JD, et al. A biphasic growth model for cell pole elongation in mycobacteria. *Nat Commun*.  
437 2020;11: 452. doi:10.1038/s41467-019-14088-z
- 438 38. Cameron TA, Anderson-Furgeson J, Zupan JR, Zik JJ, Zambryski PC. Peptidoglycan  
439 Synthesis Machinery in *Agrobacterium tumefaciens* During Unipolar Growth and Cell  
440 Division. Harwood CS, editor. *mBio*. 2014;5: e01219-14. doi:10.1128/mBio.01219-14

- 441 39. Sieger B, Bramkamp M. Interaction sites of DivIVA and RodA from *Corynebacterium*  
442 *glutamicum*. *Front Microbiol.* 2015;5. doi:10.3389/fmicb.2014.00738
- 443 40. Hett EC, Chao MC, Rubin EJ. Interaction and Modulation of Two Antagonistic Cell Wall  
444 Enzymes of Mycobacteria. *PLOS Pathogens.* 2010;6: e1001020.  
445 doi:10.1371/journal.ppat.1001020
- 446 41. Kieser KJ, Boutte CC, Kester JC, Baer CE, Barczak AK, Meniche X, et al. Phosphorylation  
447 of the Peptidoglycan Synthase PonA1 Governs the Rate of Polar Elongation in  
448 Mycobacteria. *PLoS Pathog.* 2015;11: e1005010. doi:10.1371/journal.ppat.1005010
- 449 42. García-Heredia A, Kado T, Sein CE, Puffal J, Osman SH, Judd J, et al. Membrane-  
450 partitioned cell wall synthesis in mycobacteria. *eLife.* 2021;10: e60263.  
451 doi:10.7554/eLife.60263
- 452 43. Van Den Ent F, Vinkenvleugel TMF, Ind A, West P, Veprintsev D, Nanninga N, et al.  
453 Structural and mutational analysis of the cell division protein FtsQ. *Molecular*  
454 *Microbiology.* 2008;68: 110–123. doi:10.1111/j.1365-2958.2008.06141.x
- 455 44. Vega DE, Margolin W. Direct Interaction between the Two Z Ring Membrane Anchors  
456 FtsA and ZipA. Brun YV, editor. *J Bacteriol.* 2019;201. doi:10.1128/JB.00579-18
- 457 45. Gonzalez MD, Beckwith J. Divisome under construction: distinct domains of the small  
458 membrane protein FtsB are necessary for interaction with multiple cell division proteins. *J*  
459 *Bacteriol.* 2009;191: 2815–2825. doi:10.1128/JB.01597-08
- 460 46. Gonzalez MD, Akbay EA, Boyd D, Beckwith J. Multiple interaction domains in FtsL, a  
461 protein component of the widely conserved bacterial FtsLBQ cell division complex. *J*  
462 *Bacteriol.* 2010;192: 2757–2768. doi:10.1128/JB.01609-09
- 463 47. Nguyen L, Scherr N, Gatfield J, Walburger A, Pieters J, Thompson CJ. Antigen 84, an  
464 effector of pleiomorphism in *Mycobacterium smegmatis*. *J Bacteriol.* 2007;189: 7896–  
465 7910. doi:10.1128/JB.00726-07

- 466 48. Lewis JA, Hatfull GF. Control of Directionality in L5 Integrase-mediated Site-specific  
467 Recombination. *Journal of Molecular Biology*. 2003;326: 805–821. doi:10.1016/S0022-  
468 2836(02)01475-4
- 469 49. van Kessel JC, Hatfull GF. Mycobacterial Recombineering. *Methods in Molecular Biology*  
470 (Clifton, NJ). 2008;435: 203–215.
- 471 50. Gibson DG, Young L, Chuang R-Y, Venter JC, Hutchison CA, Smith HO. Enzymatic  
472 assembly of DNA molecules up to several hundred kilobases. *Nat Methods*. 2009;6: 343–  
473 345. doi:10.1038/nmeth.1318
- 474 51. Rabe BA, Cepko C. A Simple Enhancement for Gibson Isothermal Assembly. *Molecular*  
475 *Biology*; 2020 Jun. doi:10.1101/2020.06.14.150979
- 476 52. Ducret A, Quardokus EM, Brun YV. MicrobeJ, a tool for high throughput bacterial cell  
477 detection and quantitative analysis. *Nature Microbiology*. 2016;1: 16077.  
478 doi:10.1038/nmicrobiol.2016.77
- 479 53. Wei J-R, Krishnamoorthy V, Murphy K, Kim J-H, Schnappinger D, Alber T, et al.  
480 Depletion of antibiotic targets has widely varying effects on growth. *PNAS*. 2011;108:  
481 4176–4181. doi:10.1073/pnas.1018301108
- 482 54. Kieser KJ, Boutte CC, Kester JC, Baer CE, Barczak AK, Meniche X, et al. Phosphorylation  
483 of the Peptidoglycan Synthase PonA1 Governs the Rate of Polar Elongation in  
484 Mycobacteria. Behr MA, editor. *PLOS Pathogens*. 2015;11: e1005010.  
485 doi:10.1371/journal.ppat.1005010

486

487

488 Supplemental Table 1. Strains.

489

| Strains  |                    |                                                                                       |              |
|----------|--------------------|---------------------------------------------------------------------------------------|--------------|
| Strain # | nickname           | genotype                                                                              | Figure panel |
| CB966    | Ptet:: <i>plrA</i> | <i>mc</i> <sup>2</sup> 155 $\Delta$ <i>plrA</i> :: <i>zeoR</i> L5::pMC1s- <i>plrA</i> | 1            |

|        |                                                         |                                                                                         |        |
|--------|---------------------------------------------------------|-----------------------------------------------------------------------------------------|--------|
| CB913  | <i>plrA</i> -GFPmut3                                    | mc <sup>2</sup> 155 L5::pCT94- <i>plrA</i> -GFPmut3                                     | 2      |
| CB2642 | $\Delta$ <i>plrA</i> L5:: <i>plrA</i> -strep            | mc <sup>2</sup> 155zeoR:: $\Delta$ <i>plrA</i> L5::pCT94- <i>plrA</i> -strep            | 3BCDEF |
| CB2645 | $\Delta$ <i>plrA</i> L5:: <i>plrA</i> $\Delta$ CT-strep | mc <sup>2</sup> 155zeoR:: $\Delta$ <i>plrA</i> L5::pCT94- <i>plrA</i> $\Delta$ CT-strep | 3BCDEF |
| CB2656 | mc <sup>2</sup> 155 L5:: <i>plrA</i> -strep             | mc <sup>2</sup> 155 L5:: pCT94- <i>plrA</i> -strep                                      | 3C     |
| CB2657 | mc <sup>2</sup> 155 L5:: <i>plrA</i> $\Delta$ CT-strep  | mc <sup>2</sup> 155 L5:: pCT94 - <i>plrA</i> $\Delta$ CT-strep                          | 3C     |
| CB2658 | mc <sup>2</sup> 155 L5:: <i>plrA</i> $\Delta$ NT-strep  | mc <sup>2</sup> 155 L5:: pCT94- <i>plrA</i> $\Delta$ NT-strep                           | 3C     |
| CB2660 | Ptet:: <i>plrA</i> Wag31-RFP                            | mc2155 zeoR:: $\Delta$ <i>plrA</i> L5::pCT16- <i>plrA</i> / pMEK-Ptb21-Wag31-RFP        | 4      |

490

491

492

493 Supplemental Table 2. Plasmids.

494 \*If a published vector was used unaltered, it is indicated with an \* in the “Ref for parent/vector”

495 column.

496

| <b>Plasmids.</b> |                                 |                   |                         |
|------------------|---------------------------------|-------------------|-------------------------|
| strain #         | Plasmid name                    | Used in strains   | Ref for parent/ vector* |
| CB964            | pMC1s- <i>plrA</i>              | CB966,<br>CB2321  | [53]                    |
| CB909            | pCT94- <i>plrA</i> -GFPmut3     | CB1126            | [54]                    |
| CB1401           | pCT94-MSMEG_5223-strep          | CB2656,<br>CB2642 | [54]                    |
| CB2636           | pCT94 - 5223- $\Delta$ CT-strep | CB2657,<br>CB2645 | [54]                    |
| CB2637           | pCT94 - 5223- $\Delta$ NT-strep | CB2658            | [54]                    |



|         |                      |        |      |
|---------|----------------------|--------|------|
| CB 1261 | pMEK-Ptb21-Wag31-RFP | CB2660 | [23] |
|         |                      |        |      |
|         |                      |        |      |

497

498

499

500

501

| Primers  |                                          |                                                                  |
|----------|------------------------------------------|------------------------------------------------------------------|
| Strain # | Feature                                  | primers                                                          |
| CB966    | $\Delta$ <i>plrA</i> ::zeoR              | GGCCAGTGAATTACTTAAGAGATCTtcgctcgtcgtgaagacc                      |
|          |                                          | ATAGCATACATTATACGAAGTTATacgtagcagaagccgaagac                     |
|          |                                          | gtcttcggtctctgctacgtATAACTTCGTATAATGTATGCTAT                     |
|          |                                          | cggactccgaacgatgatcATAACTTCGTATAGCATACATTATA                     |
|          |                                          | TATAATGTATGCTATACGAAGTTATgatcatcgttcggagtagcc                    |
|          |                                          | CTATGACCATGATTACGCCAAGCTTctctcacagaccacgctgag                    |
|          | pMC1s- <i>plrA</i>                       | CTTAATTAAGAAGGAGATATATCGATgccgtggtggggtgccgtgttg                 |
|          |                                          | AGATATCCATGGATCCAGCTGCAGAAATcagtcccgcgagtgacggcc                 |
| CB913    | pCT94- <i>plrA</i> - GFPmut3             | AATGAGCACGATCCGCATGCTTAATTAAGAAGGAGATATCatg<br>ccgtggtggggtgccgt |
|          |                                          | CAGTGAAAAGTTCTTCTCCTTTACTGGTACCgtcccgcgagtgacggcc<br>ccgc        |
|          |                                          | gggccgtcactcgcgggacGGTACCAGTAAAGGAGAAGAACTTTTCAC                 |
|          |                                          | GGTCCCCAATTAATTAGCTAAAGCTTcaTTTGTATAGTTCAT<br>CCATGCCATGT        |
| CB2656   | pCT94- <i>plrA</i> -<br>strep            | GCATGCTTAATTAAGAAGGAGATATACATatgccgtggtggggtgccgtgttggcg<br>gct  |
|          |                                          | AACTGGGGGTGGCTCCAGTCGGCGCCGGTGGAGTGGATATCgtcccgc<br>gagtgacggcc  |
|          |                                          | TAGGGTCCCCAATTAATTAGCTAAAGCTTTCACTTCTCGAACTGGGG<br>GTGGCTCCAGTC  |
| CB2657   | pCT94 – <i>plrA</i><br>$\Delta$ CT-strep | GCATGCTTAATTAAGAAGGAGATATACATatgccgtggtggggtgccgtgttggc          |

|        |                                 |                                                                                                                                  |
|--------|---------------------------------|----------------------------------------------------------------------------------------------------------------------------------|
|        |                                 | CTAGGGTCCCCAATTAATTAGCTAAAGCTTCTACTTCTCGAACTGGG<br>GGTGGCTCCAataccagcggcccagcccgatcagc                                           |
| CB2658 | pCT94-<br><i>plrA</i> ΔNT-strep | GCATGCTTAATTAAGAAGGAGATATACATatggtcgggctgacgtcccgcgacac<br>cg<br>AACTGGGGGTGGCTCCAGTCGGCGCCGGTGGAGTGGATATCgtcccgc<br>gagtgacggcc |
|        |                                 |                                                                                                                                  |

502

503

504

505

506

507

508

509

510

511

512
